# Supplementary material for: Transcriptome Profiling of the Cancer, Adjacent Non-Tumor and Distant Normal Tissues from a Colorectal Cancer Patient by Deep Sequencing
Source: PLoS One. 2012 Aug 8;7(8):e41001. doi: 10.1371/journal.pone.0041001 (PMC3414479; doi:10.1371/journal.pone.0041001)
Supplement: Table S6 — Gene expression of PTGFRN, NOTCH gene and Notch-targed genes based on Notch signaling pathway in KEGG. (XLS) [file pone.0041001.s014.xls]

## Sheet: Sheet1
Table S6. Gene expression of PTGFRN, NOTCH gene and Notch-targed genes based on Notch signaling pathway in KEGG.
Ensembl_gene_id	gene_name	locus	FPKM*			ln(fold_change)			q_value			is_DEG
			s1	s2	s3	s2/s1	s3/s1	s3/s2	s1s2	s1s3	s2s3	s1s2	s1s3	s2s3
ENSG00000134247	PTGFRN	chr1:117452678-117532980	32.3372	31.9494	75.1477	-0.0120653	0.843236	0.855302	1.34908	0.242562	0.196011	no	no	no
ENSG00000148400	NOTCH1	chr9:139388895-139440314	15.0549	10.9295	11.3956	-0.320238	-0.278473	0.0417644	1.05449	1.09934	1.33436	no	no	no
ENSG00000134250	NOTCH2	chr1:120454175-120612240	14.522	12.189	15.9016	-0.175135	0.0907551	0.26589	1.21235	1.29024	1.10183	no	no	no
ENSG00000074181	NOTCH3	chr19:15270444-15311792	10.8911	15.9486	42.3688	0.381425	1.35847	0.977041	1	1	1	no	no	no
ENSG00000204301	NOTCH4	chr6:32162619-32191844	3.6295	3.61443	15.0933	-0.004162	1.42515	1.42932	1.35411	0.00221879	0.00205074	no	yes	yes
ENSG00000171611	PTCRA#	chr6:42883726-42893898	0.32865	0.104915	0.103624	-1.14184	-1.15422	-0.0123802	1	1	1	no	no	no
ENSG00000114315	HES1#	chr3:193853933-193856521	46.5166	46.3923	54.3171	-0.00267628	0.15503	0.157706	1.35408	1.23702	1.23639	no	no	no
ENSG00000197921	HES5#	chr1:2460183-2461684	0.464541	0.199975	0.189096	-0.842857	-0.898795	-0.0559378	1	1	1	no	no	no
*: s1, s2 and s3 denoted the normal, adjacent non-tumor and cancer tissusl;
#: Notch-target genes.

## Sheet: Sheet2
DTX2		RBPJL
KIAA1528		RBP-L
MGC71098		RBPSUHL
RNF58		SUH
DTX3L		SUHL
BBAP		RBPJ
DTX1		CBF1
hDx-1		IGKJRB
DTX3		IGKJRB1
FLJ34766		KBF2
MGC138863		MGC61669
MGC138864		RBP-J
RNF154		RBPJK
DTX4		RBPSUH
KIAA0937		csl
MGC141899
RNF155
